# Supplementary material
Source: MDPI journal article supplement (https://www.mdpi.com/2313-433X/9/2/48)
Supplement: s1 [file s1]

Supplement

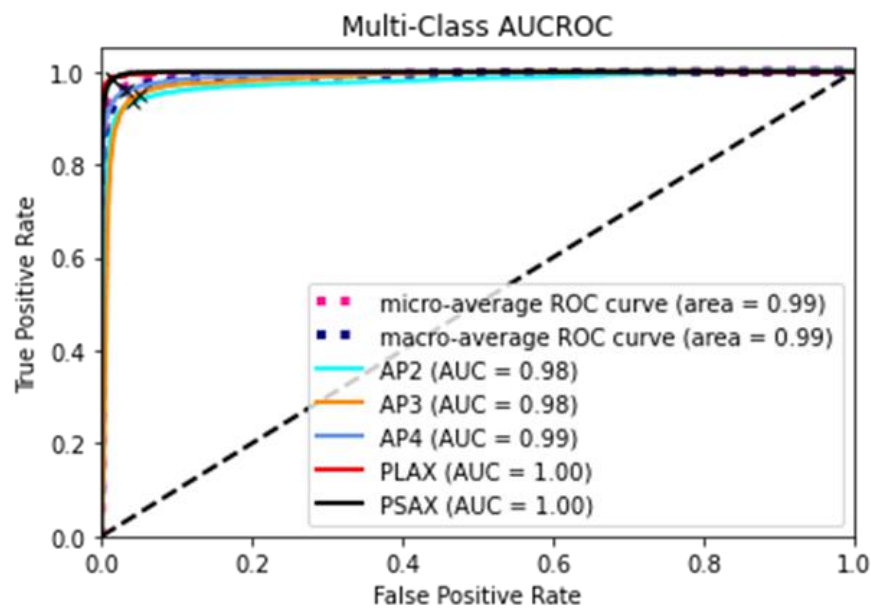

Figure S1. The receiver operating curves for the view classification.

Table S1. The Cohen Kappa coefficients of agreement between two readers

|          | AI    | Reader 1 | Reader 2 | Reader 3 |
|----------|-------|----------|----------|----------|
| AI       | 1.000 | 0.755    | 0.792    | 0.750    |
| Reader 1 | --    | 1.000    | 0.800    | 0.794    |
| Reader 2 | --    | --       | 1.000    | 0.812    |
| Reader 3 | --    | --       | --       | 1.000    |
